# Supplementary material for: Intelligent layered nanoflare: “lab-on-a-nanoparticle” for multiple DNA logic gate operations and efficient intracellular delivery
Source: Royal Society of Chemistry journal article supplement (doi:10.1039/c4nr01676a), 2014-01-01
Supplement: c4nr01676a1.pdf [file c4nr01676a1.pdf]

## Electronic Supplementary Information (ESI)

*for*

### **Intelligent Layered Nanoflare: DNA Computing on a Single Gold Nanoparticle for Multiple Logic Gates Operation**

**Bin Yang, Xiao-Bing Zhang,\* Li-Ping Kang, Zhi-Mei Huang, Guo-Li Shen, Ru-Qin Yu and Weihong Tan\***

*Molecular Science and Biomedicine Laboratory, State Key Laboratory of Chemo/Biosensing and Chemometrics, College of Chemistry and Chemical Engineering, College of Biology, Collaborative Innovation Center for Chemistry and Molecular Medicine, Hunan University, Changsha 410082.*

**Table S1.** List of oligonucleotides used.

| Name                                           | Sequence                                                                 |
|------------------------------------------------|--------------------------------------------------------------------------|
| <b>Inputs:</b>                                 |                                                                          |
| G <sub>in</sub>                                | <u>TATGGTTGTTTATGTGTTCCCTGATCTTTAGCCTTA</u>                              |
| F <sub>in</sub>                                | GTTAGATGTTAGTTTCACGAAGACAATGATTAAGGC                                     |
| G <sub>in-6</sub>                              | TGTTTATGTGTTCCCTGATCTTTAGCCTTA                                           |
| <b>AND:</b>                                    |                                                                          |
| E-SH thiol- TTTT                               | GTTAGATGTTAGTTTCACGAAGACAATGAT                                           |
| F <sub>f</sub>                                 | GTTTATGTGTTCCCTGATCTTTA <u>GCCTTA</u> ATCATTGTCTTCGTGAAACTAACATCTAAC-FAM |
| G                                              | TAAGGCTAAAGATCAGGGAACACATAAAACA <u>ACCATA</u>                            |
| <b>OR:</b>                                     |                                                                          |
| E-SH thiol- TTTT                               | GTTAGATGTTAGTTTCACGAAGACAATGAT                                           |
| F-1                                            | <u>GCCTTA</u> ATCATTGTCTTCGTGAAACTAACATCTAAC-TAMRA                       |
| G-SH                                           | TGTTTATGTGTTCCCTGATCTTTAGCCTTA TTTT-thiol                                |
| G-1                                            | TAMRA-TAAGGCTAAAGATCAGGGAACACATAAAACA <u>ACCATA</u>                      |
| <b>NOT:</b>                                    |                                                                          |
| G <sub>not</sub> -SH thiol- TTTT               | GTGTTTATAGCGGACCCCTACTGAGTTGTG                                           |
| G-2                                            | ROX-TGTTTATGTGTTCCCTGATCTTTA CACAATCAGTAGGGGTCCGCTATAAACAC               |
| G                                              | TAAGGCTAAAGATCAGGGAACACATAAAACA <u>ACCATA</u>                            |
| <b>AND (three-input):</b>                      |                                                                          |
| E-SH thiol- TTTT                               | GTTAGATGTTAGTTTCACGAAGACAATGAT                                           |
| F <sub>f</sub>                                 | GTTTATGTGTTCCCTGATCTTTA <u>GCCTTA</u> ATCATTGTCTTCGTGAAACTAACATCTAAC-FAM |
| G-ATP                                          | TAAGGCTAAAGATCAGGGAACACATAAAACA <u>ACCATA</u> ACCTTC                     |
| Apt-ATP:                                       | ACCTGGG GGAGTATTGCGGAG GAAGGT TATGGT                                     |
| <b>Multiple logic system 1:</b>                |                                                                          |
| E-SH thiol- TTTT                               | GTTAGATGTTAGTTTCACGAAGACAATGAT                                           |
| G-3                                            | ROX-TGTTTATGTGTTCCCTGATCTTTAGCCTTAATCATTGTCTTCGTGAAACTAACATCTAAC-FAM     |
| G-1                                            | TAMRA-TAAGGCTAAAGATCAGGGAACACATAAAACA <u>ACCATA</u>                      |
| <b>Multiple logic system 2:</b>                |                                                                          |
| The combination of the AND, OR, and NOT gates. |                                                                          |

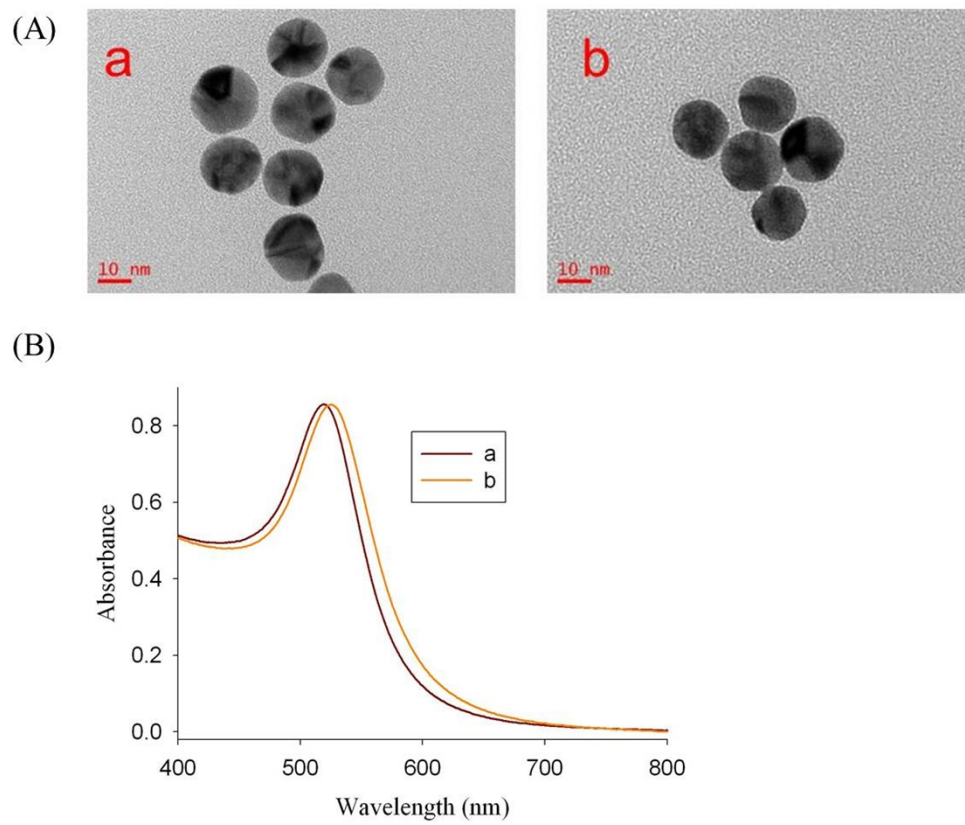

**Figure S1.** TEM images (A) and UV-vis spectra (B): Au NPs (a) and nanoflare (b).

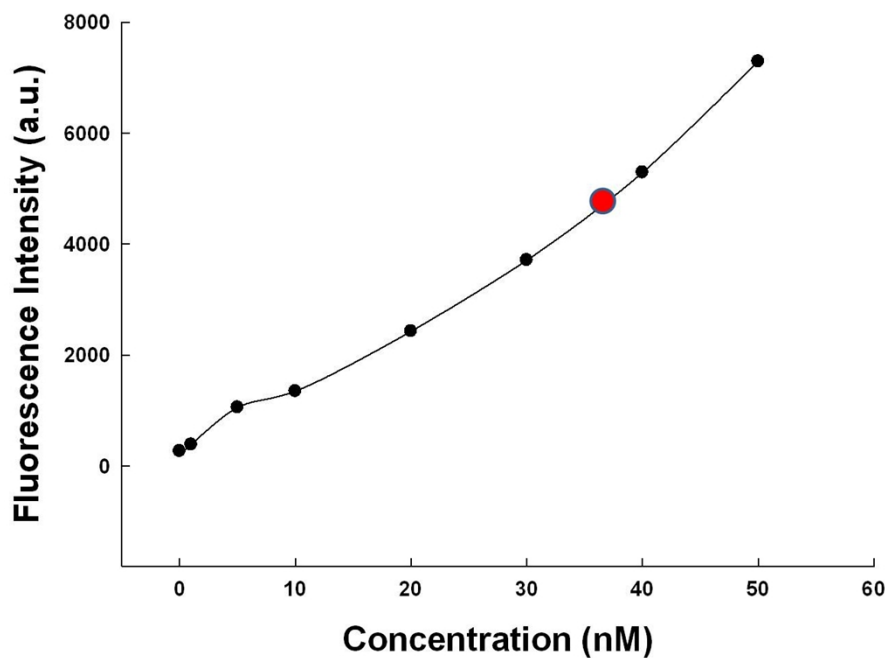

**Figure S2.** Standard linear calibration curves of DNA flares (Red dot indicates the number of flares measured for the AND gate).

Quantitation of DNA duplexes on AuNPs: Briefly, 2  $\mu$ L 2 M mercaptoethanol were added to a 200 $\mu$ L 3 nM nanoflare solution, and after incubating for 24 h at room temperature, the released DNA flares were separated *via* centrifugation. Finally, aliquots of the supernatant were diluted 5-fold with TAE buffer, and the fluorescence was measured. Based on the standard linear calibration curve in Figure S2, about 60 green flares per AuNP were calculated for the two-input AND gate.

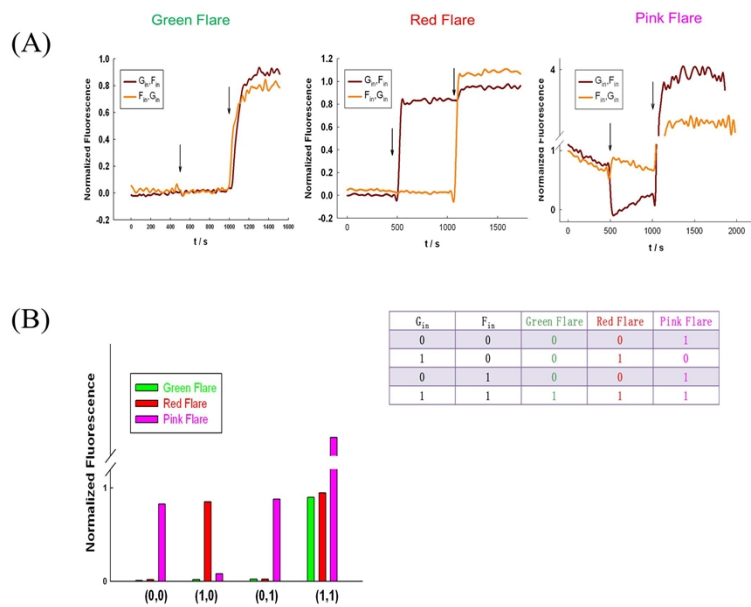

**Figure S3.** (A) Time-dependent fluorescence changes of corresponding channel. (B) Bar diagram and truth table of the multiple logic system 1.

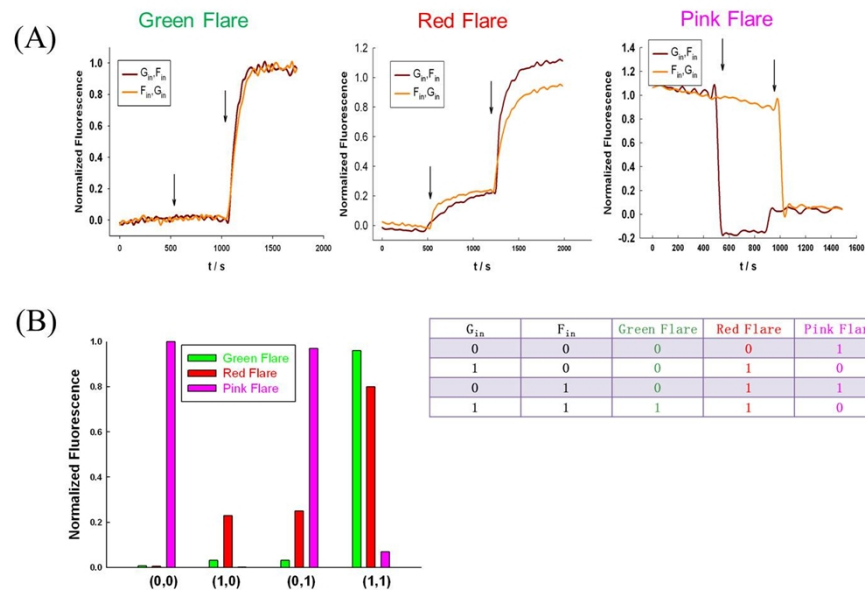

**Figure S4.** (A) Time-dependent fluorescence changes of the corresponding channel. (B) Bar diagram and truth table of the multiple logic system 2.

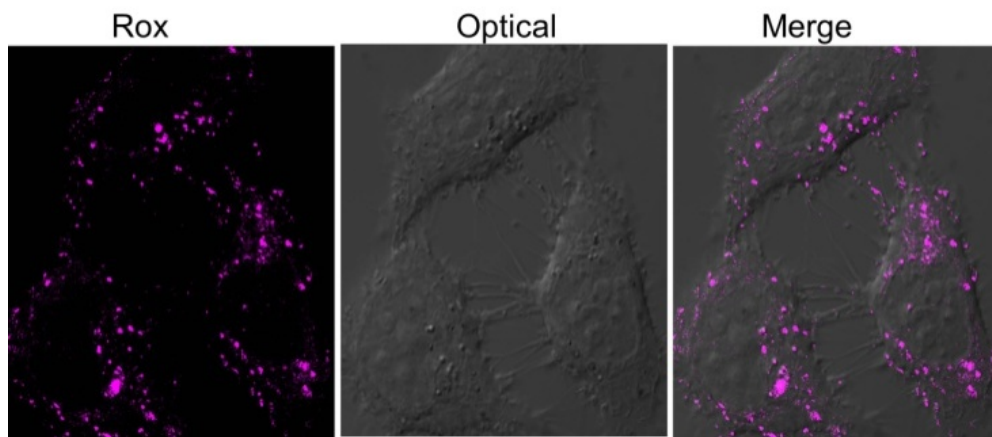

**Figure S5.** Confocal fluorescence images of the nanoflare for the multiple logic system 1 in HeLa cells.
